# Supplementary material
Source: HighWire-hosted journal article supplement (https://erj.ersjournals.com/content/55/4/1901104)
Supplement: inline-supplementary-material-2 [file inline-supplementary-material-2.pdf]

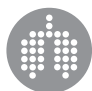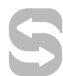

SHAREABLE PDF

# EAN/ERS/ESO/ESRS statement on the impact of sleep disorders on risk and outcome of stroke

Claudio L.A. Bassetti<sup>1,2,23</sup>, Winfried Randerath<sup>3,23</sup>, Luca Vignatelli<sup>4</sup>,  
Luigi Ferini-Strambi<sup>5</sup>, Anne-Kathrin Brill<sup>6</sup>, Maria R. Bonsignore<sup>7</sup>,  
Ludger Grote<sup>8</sup>, Poul Jennum<sup>9</sup>, Didier Leys<sup>10</sup>, Jens Minnerup<sup>11</sup>, Lino Nobili<sup>12</sup>,  
Thomy Tonia<sup>13</sup>, Rebecca Morgan<sup>14</sup>, Joel Kerry<sup>15</sup>, Renata Riha<sup>16,17</sup>,  
Walter T. McNicholas<sup>18,19,20,24</sup> and Vasileios Papavasileiou<sup>21,22,24</sup>

**Affiliations:** <sup>1</sup>Neurology Dept, Medical Faculty, University Hospital, Bern, Switzerland. <sup>2</sup>Dept of Neurology, Sechenov First Moscow State Medical University, Moscow, Russia. <sup>3</sup>Bethanien Hospital, Clinic of Pneumology and Allergology, Center for Sleep Medicine and Respiratory Care, Institute of Pneumology at the University of Cologne, Solingen, Germany. <sup>4</sup>Servizio di Epidemiologia e Biostatistica IRCCS, Istituto delle Scienze Neurologiche di Bologna Ospedale Bellaria, Bologna, Italy. <sup>5</sup>Dept of Neurology OSR-Turro, Sleep Disorder Center, Vita-Salute San Raffaele University, Milan, Italy. <sup>6</sup>Dept of Pulmonary Medicine, University and University Hospital Bern, Bern, Switzerland. <sup>7</sup>PROMISE Dept, Division of Respiratory Medicine, DiBiMIS, University of Palermo and IBIM-CNR, Palermo, Italy. <sup>8</sup>Sleep Disorders Center, Dept of Pulmonary Medicine, Sahlgrenska University Hospital, Göteborg, Sweden. <sup>9</sup>Danish Center for Sleep Medicine, Rigshospitalet, Copenhagen, Denmark. <sup>10</sup>Dept of Neurology, University of Lille, Lille, France. <sup>11</sup>Dept of Neurology and Institute for Translational Neurology, University of Muenster, Muenster, Germany. <sup>12</sup>Child Neuropsychiatry Unit, Gaslini Institute DINOEMI, University of Genova, Genoa, Italy. <sup>13</sup>Institute of Social and Preventive Medicine, University of Bern, Bern, Switzerland. <sup>14</sup>Dept of Health Research Methods, Evidence, and Impact, McMaster University, Hamilton, ON, Canada. <sup>15</sup>Library and Information Service, Leeds Teaching Hospitals NHS Trust, Leeds, UK. <sup>16</sup>Sleep Research Unit, Centre for Clinical Brain Sciences, University of Edinburgh, Edinburgh, UK. <sup>17</sup>Dept of Sleep Medicine, Royal Infirmary of Edinburgh, Edinburgh, UK. <sup>18</sup>Dept of Respiratory and Sleep Medicine, St. Vincent's University Hospital, Dublin, Ireland. <sup>19</sup>School of Medicine, University College Dublin, Dublin, Ireland. <sup>20</sup>First Affiliated Hospital of Guangzhou Medical University, Guangzhou, China. <sup>21</sup>Leeds Teaching Hospital NHS Trust, Leeds, UK. <sup>22</sup>Medical School, University of Leeds, Leeds, UK. <sup>23</sup>Co-shared first authorship. <sup>24</sup>Co-shared senior authorship.

**Correspondence:** Winfried Randerath, Bethanien Hospital, University of Cologne, Pneumology, Aufderhoeher Str. 169, Solingen 42699, Germany. E-mail: randerath@klinik-bethanien.de

**Correspondence:**

**Correspondence:** Claudio Bassetti, Neurology Dept, Inselspital, University of Bern, Freiburgstrasse 18, 3010 Bern, Switzerland. E-mail: Claudio.Bassetti@insel.ch

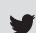

@ERSpublications

**Evidence suggests a bidirectional relationship between sleep and stroke. However, the pathophysiological base of the associations and the possibilities of improving prevention and outcome through sleep-related interventions require further evaluation.** <http://bit.ly/36De7Cy>

**Cite this article as:** Bassetti CLA, Randerath W, Vignatelli L, *et al.* EAN/ERS/ESO/ESRS statement on the impact of sleep disorders on risk and outcome of stroke. *Eur Respir J* 2020; 55: 1901104 [<https://doi.org/10.1183/13993003.01104-2019>].

This single-page version can be shared freely online.

The article has been co-published with permission in the *European Respiratory Journal* and the *European Journal of Neurology*. The articles are identical except for minor stylistic and spelling differences in keeping with each journal's style. Either citation can be used when citing this article. Copyright ©European Academy of Neurology and European Respiratory Society 2020.

**ABSTRACT** Sleep disorders are highly prevalent in the general population and may be linked in a bidirectional fashion to stroke, which is one of the leading causes of morbidity and mortality.

Four major scientific societies established a task force of experts in neurology, stroke, respiratory medicine, sleep medicine and methodology, to critically evaluate the evidence regarding potential links and the impact of therapy. 13 research questions were evaluated in a systematic literature search using a stepwise hierarchical approach: first, systematic reviews and meta-analyses; second, primary studies post-dating the systematic reviews/meta-analyses. A total of 445 studies were evaluated and 88 included. Statements were generated regarding current evidence and clinical practice.

Severe obstructive sleep apnoea (OSA) doubles the risk for incident stroke, especially in young to middle-aged patients. Continuous positive airway pressure (CPAP) may reduce stroke risk, especially in treatment-compliant patients. The prevalence of OSA is high in stroke patients and can be assessed by polygraphy. Severe OSA is a risk factor for recurrence of stroke and may be associated with stroke mortality, while CPAP may improve stroke outcome. It is not clear if insomnia increases stroke risk, while pharmacotherapy of insomnia may increase it. Periodic limb movements in sleep (PLMS), but not restless limb syndrome (RLS), may be associated with an increased risk of stroke. Preliminary data suggest a high frequency of post-stroke insomnia and RLS and their association with a less favourable stroke outcome, while treatment data are scarce.

Overall, the evidence base is best for OSA relationship with stroke and supports active diagnosis and therapy. Research gaps remain especially regarding insomnia and RLS/PLMS relationships with stroke.
